# Supplementary material for: The Shape Memory Properties and Actuation Performances of 4D Printing Poly (Ether-Ether-Ketone)
Source: Polymers (Basel). 2022 Sep 11;14(18):3800. doi: 10.3390/polym14183800 (PMC9502534; doi:10.3390/polym14183800)
Supplement: Supplementary file 1 [file polymers-14-03800-s001.zip]

Archive with 4 entries (4 files):
- polymers-1893125-supplementary.pdf
- Video S1.mp4
- Video S2.mp4
- Video S3.mp4
